# Supplementary material for: Quantitation of Enterovirus A71 Empty and Full Particles by Sedimentation Velocity Analytical Ultracentrifugation
Source: MDPI journal article supplement (doi:10.3390/v16040573), 2024-04-08
Supplement: s1 [file s1]

## Quantitation of Enterovirus A71 Empty and Full Particles by Sedimentation Velocity Analytical Ultracentrifugation

Anna Yang<sup>1,2,3,4</sup>, Yun Luo<sup>5</sup>, Jie Yang<sup>1,2,3,4</sup>, Tingbo Xie<sup>1,2,3,4</sup>, Wenhui Wang<sup>1,2,3,4</sup>, Xin Wan<sup>1,2,3,4</sup>, Kaiwen Wang<sup>1,2,3,4</sup>, Deqin Pang<sup>1,2,3,4</sup>, Dongsheng Yang<sup>1,2,3,4</sup>, Hanyu Dai<sup>1,2,3,4</sup>, Jie Wu<sup>1,2,3,4</sup>, Shengli Meng<sup>1,2,3,4</sup>, Jing Guo<sup>1,2,3,4</sup>, Zejun Wang<sup>1,2,3,4</sup>, Shuo Shen<sup>1,2,3,4\*</sup>

1Wuhan Institute of Biological Products Co. Ltd., No. 1 Huangjin Industrial Park Road, Wuhan 430207, China; 13163255896@163.com(J.Y.); 18995586191@163.com (S.M.)

2National Engineering Technology Research Center of Combined Vaccines, No. 1 Huangjin Industrial Park Road, Wuhan 430207, China

3National Key Laboratory for Novel Vaccines Research and Development of Emerging Infectious Diseases, No. 1 Huangjin Industrial Park Road, Wuhan 430207, China

4Hubei Provincial Vaccines Technology Innovation Center, No. 1 Huangjin Industrial Park Road, Wuhan 430207, China

5The Research Core Facilities for Life Science (HUST), College of Life Science and Technology, Huazhong University of Science and Technology, Luoyu Road, Wuhan 430074, China

\*Correspondence: shenshuo0227@163.com

Table S1. The relative percentage of EP and FP was determined by the three detection wavelengths

|    | 230 nm  |     |                | 260 nm  |     |                | 280 nm  |     |                |
|----|---------|-----|----------------|---------|-----|----------------|---------|-----|----------------|
|    | c-value | S   | Capsid content | c-value | S   | Capsid content | c-value | S   | Capsid content |
| EP | 0.9199  | 80  | 49.27%         | 0.1580  | 80  | 29.25%         | 0.1086  | 80  | 11.71%         |
| FP | 0.9472  | 152 | 50.73%         | 0.3821  | 153 | 70.75%         | 0.8186  | 151 | 88.29%         |

Table S2. Comparison of the relative percentage of EP, as determined by the ultraviolet (230 nm) and IF detection methods

|    | 230 nm |         |             | IF |         |             | 230 nm/IF |
|----|--------|---------|-------------|----|---------|-------------|-----------|
|    | S      | c-value | Content (%) | S  | c-value | Content (%) |           |
| EP | 82     | 0.0728  | 9.76%       | 80 | 0.0226  | 11.24%      | 0.87      |
|    | 80     | 0.2366  | 36.13%      | 80 | 0.0747  | 39.54%      | 0.91      |
|    | 80     | 0.3896  | 67.71%      | 83 | 0.1331  | 73.25%      | 0.99      |

Table S3. Comparison of the relative percentage of FP, as determined by the ultraviolet (230 nm) and IF detection methods

|    | 230 nm |         |             | IF  |         |             | 230 nm/IF |
|----|--------|---------|-------------|-----|---------|-------------|-----------|
|    | S      | c-value | Content (%) | S   | c-value | Content (%) |           |
| FP | 151    | 0.6734  | 90.24%      | 149 | 0.1784  | 88.76%      | 1.02      |
|    | 151    | 0.4182  | 63.87%      | 149 | 0.1142  | 60.46%      | 1.06      |
|    | 151    | 0.1858  | 32.29%      | 159 | 0.0486  | 26.75%      | 1.02      |

Table S4. Precision verification results of the relative percentage of EP and FP

| Repeat | EP     |         |       | FP      |         |       |
|--------|--------|---------|-------|---------|---------|-------|
|        | c      | Content | S     | c       | Content | S     |
| 1      | 0.2998 | 41.32%  | 83    | 0.4257  | 58.68%  | 147   |
| 2      | 0.2981 | 41.70%  | 85    | 0.4167  | 58.30%  | 149   |
| 3      | 0.2653 | 40.97%  | 82    | 0.3822  | 59.03%  | 147   |
| 4      | 0.2809 | 41.13%  | 82    | 0.4021  | 58.87%  | 143   |
| 5      | 0.2681 | 47.73%  | 85    | 0.2936  | 52.27%  | 151   |
| 6      | 0.2673 | 42.17%  | 81    | 0.3666  | 57.83%  | 148   |
| Mean   | 0.2799 | 42.50%  | 83    | 0.38115 | 57.50%  | 148   |
| CV     | 5.62%  | 6.11%   | 2.02% | 12.62%  | 4.52%   | 1.81% |

Table S5. A summary of the FP content determined by the ultraviolet and IF detection methods compared to the theoretical percentage

| Theoretical % FP | % FP by 230 nm | % FP by IF | %230 nm-%IF |
|------------------|----------------|------------|-------------|
| 100.00%          | 100.00%        | 100.00%    | 0.00%       |
| 85.26%           | 96.72%         | 89.48%     | 7.24%       |
| 69.20%           | 88.48%         | 84.93%     | 3.55%       |
| 51.65%           | 69.70%         | 66.46%     | 3.24%       |
| 32.39%           | 33.57%         | 35.47%     | -1.90%      |
| 11.15%           | 10.06%         | 11.14%     | -1.08%      |

Table S6. A comparison of the relative percentage of EP, as determined at 4 °C and 20 °C

|    | 4 °C |         |             | 20 °C |         |             | 4 °C/20 °C |
|----|------|---------|-------------|-------|---------|-------------|------------|
|    | S    | c-value | Content (%) | S     | c-value | Content (%) |            |
| EP | 51   | 0.0882  | 9.21%       | 82    | 0.0728  | 9.76%       | 0.94       |
|    | 53   | 0.295   | 39.36%      | 80    | 0.2366  | 36.13%      | 1.09       |
|    | 51   | 0.5162  | 72.27%      | 80    | 0.3896  | 67.71%      | 1.06       |

Table S7. A comparison of the relative percentage of FP, as determined at 4 °C and 20 °C

|    | 4 °C |         |             | 20 °C |         |             | 4 °C/20 °C |
|----|------|---------|-------------|-------|---------|-------------|------------|
|    | S    | c-value | Content (%) | S     | c-value | Content (%) |            |
| FP | 95   | 0.8694  | 90.79%      | 151   | 0.6734  | 90.24%      | 1.01       |
|    | 96   | 0.4545  | 60.64%      | 151   | 0.4182  | 63.87%      | 0.95       |
|    | 96   | 0.1981  | 27.73%      | 151   | 0.1858  | 32.29%      | 0.86       |

Table S8. A comparison of the relative percentage of FP in three lots

|       | EP      |             |    | FP      |             |     |
|-------|---------|-------------|----|---------|-------------|-----|
|       | c-value | Content (%) | S  | c-value | Content (%) | S   |
| Lot 1 | 0.2149  | 36.35%      | 82 | 0.3763  | 63.65%      | 149 |
| Lot 2 | 0.2197  | 38.95%      | 81 | 0.3444  | 61.05%      | 150 |
| Lot 3 | 0.1676  | 38.95%      | 84 | 0.2627  | 61.05%      | 151 |
